# Supplementary material for: Blue-shift of Eu2+emission in (Ba,Sr)3Lu(PO4)3:Eu2+eulytite solid-solution phosphors resulting from release of neighbouring-cation-induced stress
Source: Royal Society of Chemistry journal article supplement (doi:10.1039/c4dt02319f), 2014-09-11
Supplement: c4dt02319f4.pdf [file c4dt02319f4.pdf]

## Released neighboring-cation stress induced blue-shift of $\text{Eu}^{2+}$ emission in $(\text{Ba,Sr})_3\text{Lu}(\text{PO}_4)_3:\text{Eu}^{2+}$ eulytite solid-solution phosphors

Ziyuan Wang<sup>a</sup>, Zhiguo Xia<sup>\*b</sup>, Maxim S. Molokeev<sup>c</sup>, Victor V. Atuchin<sup>d,e</sup>, QuanLin Liu<sup>b</sup>

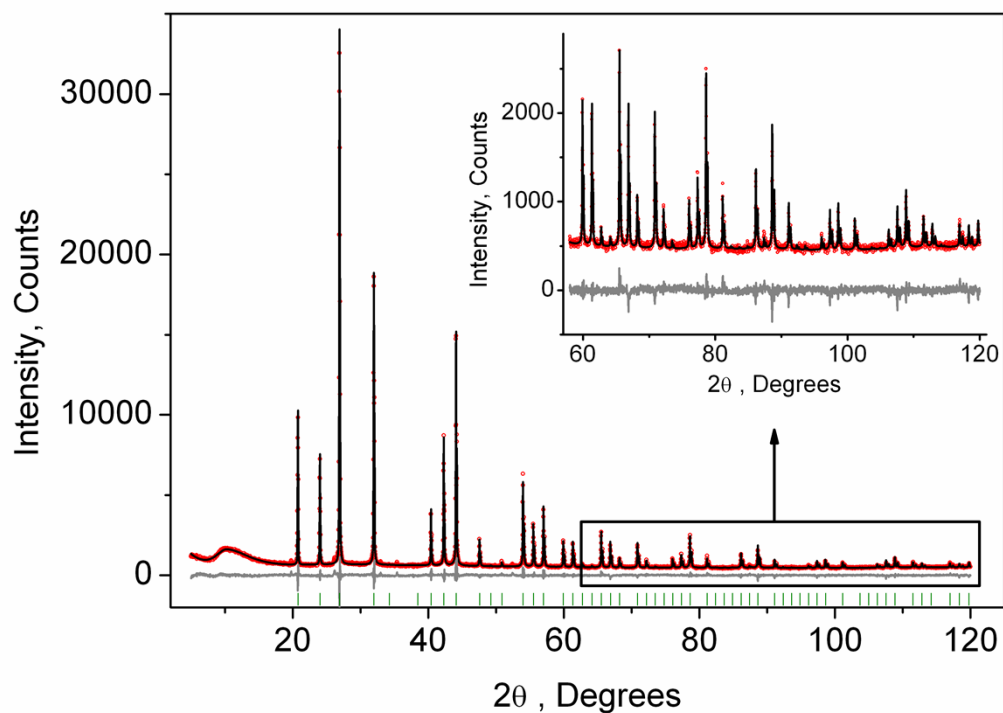

**Figure S1.** Powder XRD patterns for Rietveld structure analysis of  $\text{Ba}_{3-x}\text{Sr}_x\text{Lu}(\text{PO}_4)_3:0.03\text{Eu}$ ,  $x=0$ .

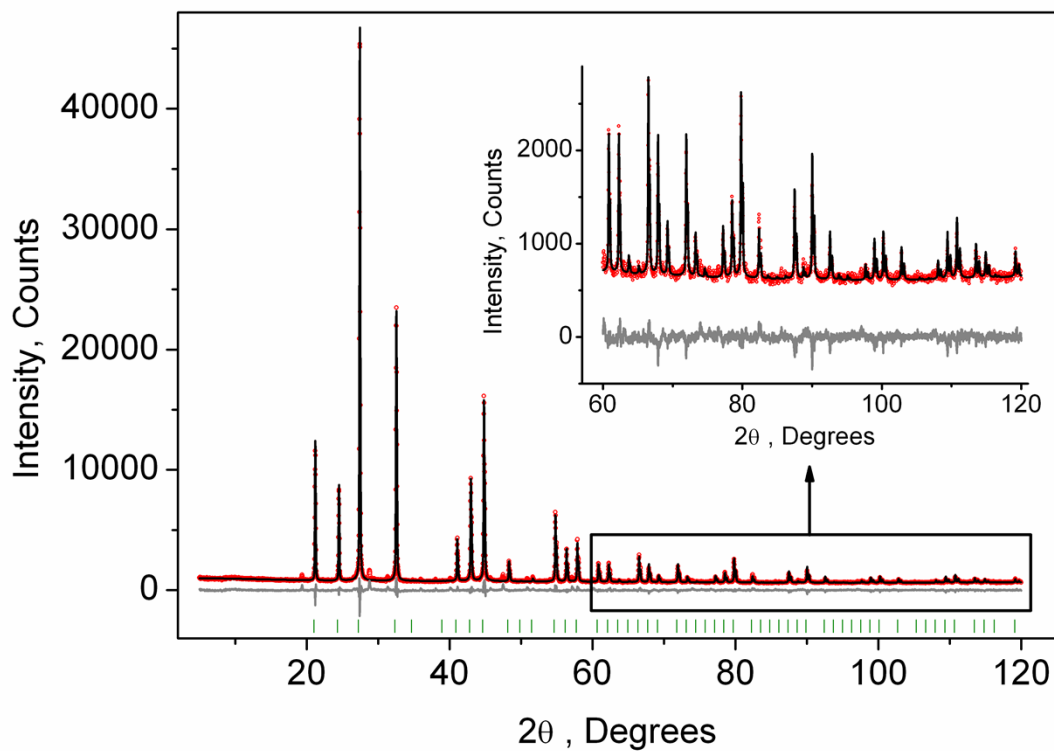

**Figure S2.** Powder XRD patterns for Rietveld structure analysis of  $\text{Ba}_{3-x}\text{Sr}_x\text{Lu}(\text{PO}_4)_3:0.03\text{Eu}$ ,  $x=1$ .

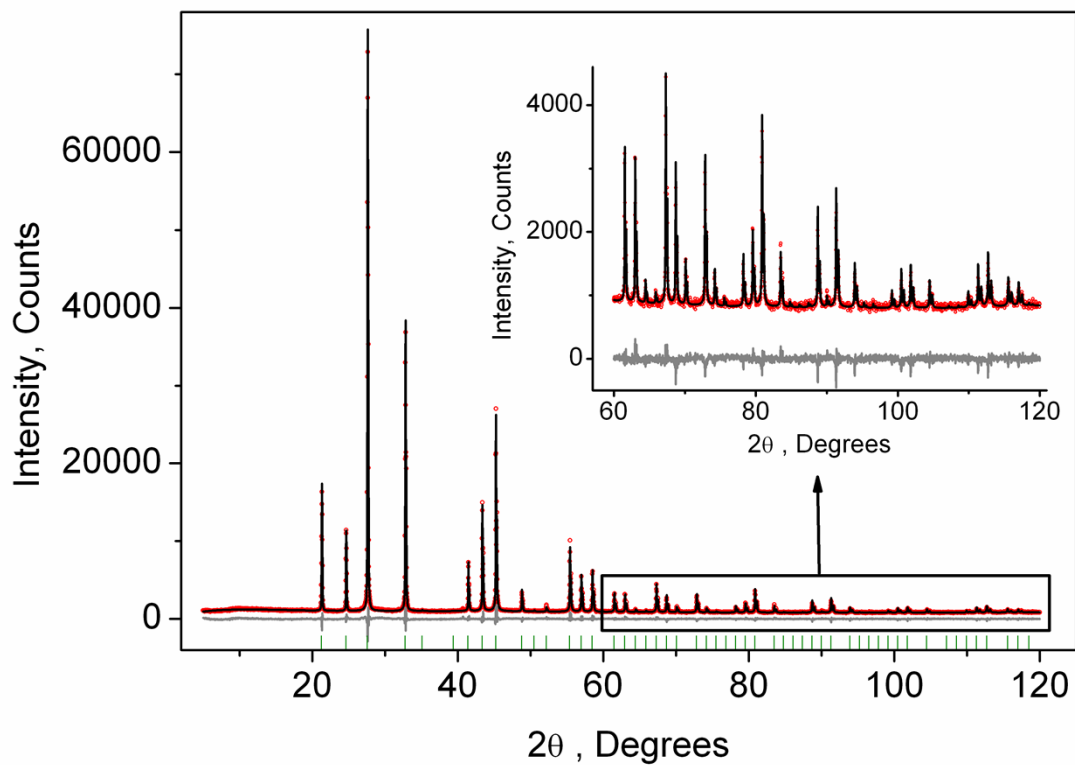

**Figure S3.** Powder XRD patterns for Rietveld structure analysis of  $\text{Ba}_{3-x}\text{Sr}_x\text{Lu}(\text{PO}_4)_3:0.03\text{Eu}$ ,  $x=2$ .

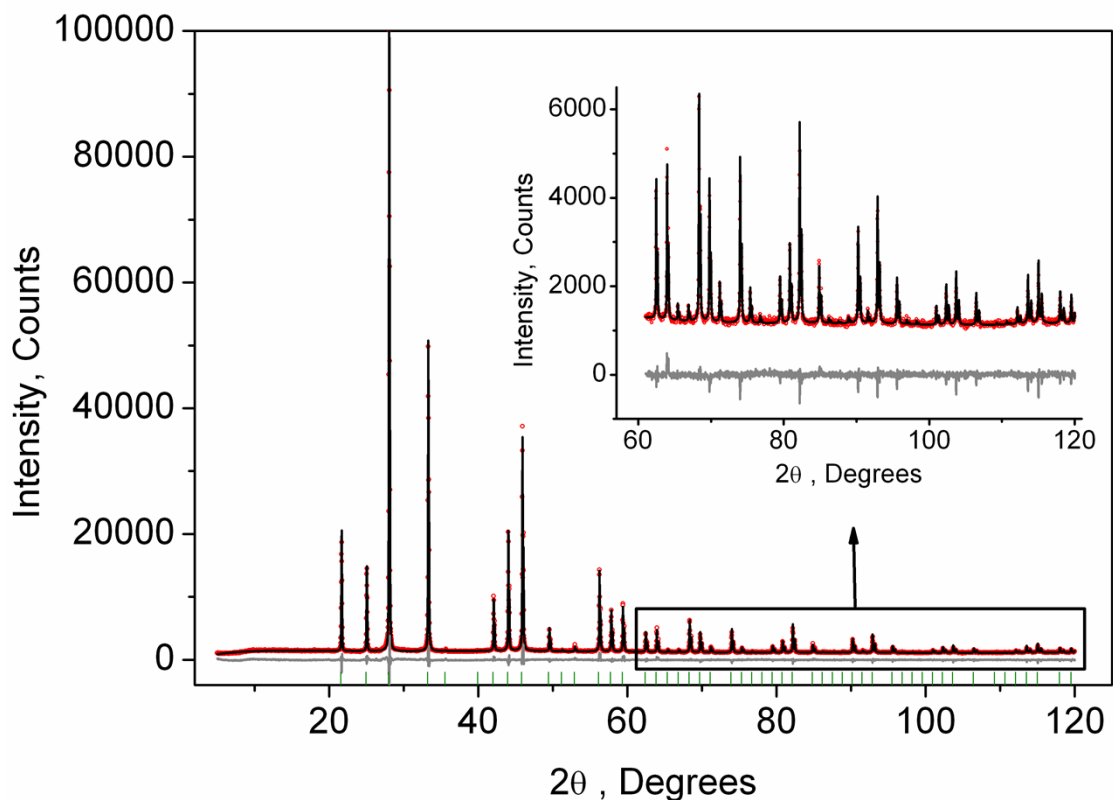

**Figure S4.** Powder XRD patterns for Rietveld structure analysis of  $\text{Ba}_{(3-x)}\text{Sr}_x\text{Lu}(\text{PO}_4)_3:0.03\text{Eu}$ ,  $x=3$ .

**Table S1.** Main parameters of processing and refinement of the  $\text{Ba}_{(3-x)}\text{Sr}_x\text{Lu}(\text{PO}_4)_3:0.03\text{Eu}$  ( $x=0, 1, 2, 3$ ) samples

| $x$                                | 0            | 1            | 2            | 3            |
|------------------------------------|--------------|--------------|--------------|--------------|
| Sp.Gr.                             | <i>I-43d</i> | <i>I-43d</i> | <i>I-43d</i> | <i>I-43d</i> |
| $a$ , Å                            | 10.46040(8)  | 10.3454(2)   | 10.22147(7)  | 10.09020(6)  |
| $V$ , Å <sup>3</sup>               | 1144.58(3)   | 1107.25(5)   | 1067.92(2)   | 1027.30(2)   |
| $Z$                                | 4            | 4            | 4            | 4            |
| $2\theta$ -interval, °             | 5-120        | 5-120        | 5-120        | 5-120        |
| Number of reflections              | 87           | 83           | 79           | 77           |
| Number of parameters of refinement | 46           | 41           | 41           | 41           |
| $R_{wp}$ , %                       | 5.73         | 6.36         | 5.07         | 4.67         |
| $R_p$ , %                          | 4.48         | 4.51         | 3.95         | 3.59         |
| $R_{exp}$ , %                      | 3.55         | 3.17         | 2.81         | 2.40         |
| $\chi^2$                           | 1.61         | 2.00         | 1.81         | 1.95         |
| $R_B$ , %                          | 1.47         | 1.70         | 1.46         | 1.69         |

**Table S2.** Fractional atomic coordinates and isotropic displacement parameters ( $\text{\AA}^2$ ) of  $\text{Ba}_{(3-x)}\text{Sr}_x\text{Lu}(\text{PO}_4)_3:0.03\text{Eu}$

|             | <i>x</i>    | <i>y</i>     | <i>z</i>    | $B_{\text{iso}}$ | Occ.       |
|-------------|-------------|--------------|-------------|------------------|------------|
| <i>x</i> =0 |             |              |             |                  |            |
| Ba          | 0.06744 (8) | 0.06744 (8)  | 0.06744 (8) | 2.0 (3)          | 0.7425     |
| Lu          | 0.06744 (8) | 0.06744 (8)  | 0.06744 (8) | 2.0 (3)          | 0.25       |
| Eu          | 0.06744 (8) | 0.06744 (8)  | 0.06744 (8) | 2.0 (3)          | 0.0075     |
| P           | 0.375       | 0            | 0.25        | 3.0 (4)          | 1          |
| O1          | 0.309 (2)   | -0.002 (2)   | 0.103 (3)   | 4.4 (6)          | 0.507 (12) |
| O2          | 0.275 (2)   | 0.074 (2)    | 0.178 (2)   | 4.4 (6)          | 0.493 (12) |
| <i>x</i> =1 |             |              |             |                  |            |
| Ba          | 0.06749 (9) | 0.06749 (9)  | 0.06749 (9) | 2.0 (4)          | 0.495      |
| Sr          | 0.06749 (9) | 0.06749 (9)  | 0.06749 (9) | 2.0 (4)          | 0.2475     |
| Lu          | 0.06749 (9) | 0.06749 (9)  | 0.06749 (9) | 2.0 (4)          | 0.25       |
| Eu          | 0.06749 (9) | 0.06749 (9)  | 0.06749 (9) | 2.0 (4)          | 0.0075     |
| P           | 0.375       | 0            | 0.25        | 3.0 (5)          | 1          |
| O1          | 0.306 (2)   | -0.006 (2)   | 0.106 (3)   | 5.0 (6)          | 0.524 (13) |
| O2          | 0.283 (2)   | 0.071 (2)    | 0.182 (3)   | 5.0 (6)          | 0.476 (13) |
| <i>x</i> =2 |             |              |             |                  |            |
| Ba          | 0.06777 (6) | 0.06777 (6)  | 0.06777 (6) | 2.0 (3)          | 0.2475     |
| Sr          | 0.06777 (6) | 0.06777 (6)  | 0.06777 (6) | 2.0 (3)          | 0.495      |
| Lu          | 0.06777 (6) | 0.06777 (6)  | 0.06777 (6) | 2.0 (3)          | 0.25       |
| Eu          | 0.06777 (6) | 0.06777 (6)  | 0.06777 (6) | 2.0 (3)          | 0.0075     |
| P           | 0.375       | 0            | 0.25        | 2.2 (3)          | 1          |
| O1          | 0.3013 (19) | -0.012 (2)   | 0.1169 (19) | 4.7 (5)          | 0.474 (16) |
| O2          | 0.2875 (18) | 0.074 (2)    | 0.1588 (14) | 4.7 (5)          | 0.526 (16) |
| <i>x</i> =3 |             |              |             |                  |            |
| Sr          | 0.06733 (6) | 0.06733 (6)  | 0.06733 (6) | 2.0 (3)          | 0.7425     |
| Lu          | 0.06733 (6) | 0.06733 (6)  | 0.06733 (6) | 2.0 (3)          | 0.25       |
| Eu          | 0.06733 (6) | 0.06733 (6)  | 0.06733 (6) | 2.0 (3)          | 0.0075     |
| P           | 0.375       | 0            | 0.25        | 2.0 (3)          | 1          |
| O1          | 0.3029 (15) | -0.0149 (19) | 0.1101 (15) | 5.0 (4)          | 0.503 (12) |
| O2          | 0.2870 (17) | 0.0760 (18)  | 0.1539 (13) | 5.0 (4)          | 0.497 (12) |

**Table S3.** Main bond lengths ( $\text{\AA}$ ) of  $\text{Ba}_{(3-x)}\text{Sr}_x\text{Lu}(\text{PO}_4)_3:0.03\text{Eu}$

|                          |          |                          |          |
|--------------------------|----------|--------------------------|----------|
| <i>x</i> =0              |          |                          |          |
| Ba/Lu/Eu—O1 <sup>i</sup> | 2.323(2) | Ba/Lu/Eu—O1              | 2.653(2) |
| Ba/Lu/Eu—O2              | 2.458(2) | Ba/Lu/Eu—O2 <sup>i</sup> | 2.968(2) |
| <i>x</i> =1              |          |                          |          |

|                               |          |                              |          |
|-------------------------------|----------|------------------------------|----------|
| Ba/Sr/Lu/Eu— O1 <sup>i</sup>  | 2.348(3) | Ba/Sr/Lu/Eu —O1              | 2.611(3) |
| Ba/Sr/Lu/Eu —O2               | 2.519(3) | Ba/Sr/Lu/Eu —O2 <sup>i</sup> | 2.937(3) |
| $x=2$                         |          |                              |          |
| Ba/Sr/Lu/Eu — O1 <sup>i</sup> | 2.432(2) | Ba/Sr/Lu/Eu — O1             | 2.571(2) |
| Ba/Sr/Lu/Eu —O2               | 2.453(2) | Ba/Sr/Lu/Eu —O2 <sup>i</sup> | 2.749(2) |
| $x=3$                         |          |                              |          |
| Sr/Lu/Eu— O1 <sup>i</sup>     | 2.368(2) | Sr/Lu/Eu— O1                 | 2.554(2) |
| Sr/Lu/Eu—O2                   | 2.384(2) | Sr/Lu/Eu—O2 <sup>i</sup>     | 2.654(2) |

Symmetry codes: (i)  $1/2-x, y, -z$
